# Supplementary material
Source: PubMed Central journal article supplement (PMC1356337)

**A**

PI3Kc domain

| Identity /<br>Similarity | HsATM        | HsATR        | CeATM-1      |
|--------------------------|--------------|--------------|--------------|
| CeATM-1                  | 39% /<br>59% | 29% /<br>49% |              |
| CeATL-1                  | 31% /<br>51% | 39% /<br>57% | 26% /<br>44% |

**B**

N2(Wt)

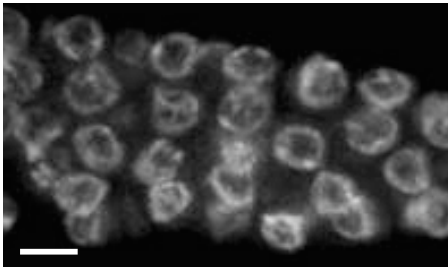*atl-1(tm853)*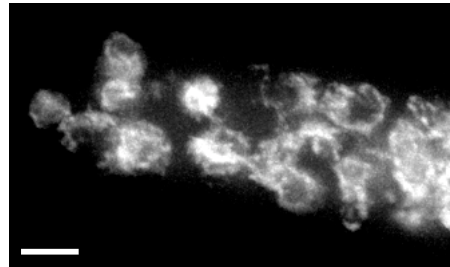*atl-1(tm853)*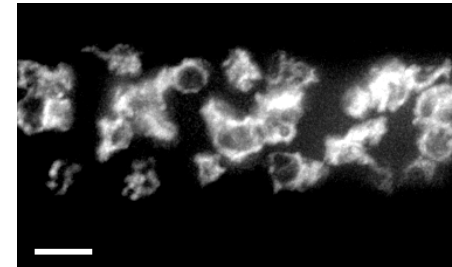

Supplement: 7600896s1.pdf [file 7600896s1.pdf]
