# Supplementary material
Source: PubMed Central journal article supplement (PMC1356337)
Supplement: 7600896s6.pdf [file 7600896s6.pdf]

**Figure S1. (A) Identity and similarity of *C. elegans* ATL-1 and ATM-1 compared with *H. sapiens* ATM and ATR.** The table shows the percentages for the PI3K domain. **(B) *atl-1* mutants exhibit mitotic catastrophe in the germline.** Representative images of mitotic germline nuclei stained with DAPI for the indicated genotypes (scale bar = 5 $\mu$ M).

**Figure S2. *+atl-1(tm853)* and *atl-1(RNAi)* characterization.** (A) Representative images of fixed germlines of the indicated genotype immunostained with RPA-1 and RAD-51 antibodies and counterstained with DAPI. Quantification of the number of RPA-1 and RAD-51 foci per nucleus for the indicated genotypes is shown in the graph on the right. Error bars indicate standard error of mean from at least 20 nuclei from 10-15 worms of each genotype. (B) Quantification of HU-induced cell cycle arrest of mitotic germline nuclei that was determined in animals of the indicated genotype by scoring the number of nuclei in a volume of  $54,000\mu\text{m}^3$  16 hours after exposure of L4 stage animals to 40mM hydroxyurea, as previously described (Ahmed et al., 2001). (C) Quantification of IR-induced cell cycle arrest of mitotic germline nuclei in animals of the indicated genotype that was determined by scoring the number of nuclei in a volume of  $54,000\mu\text{m}^3$  12 hours after exposure of L4 stage animals to 75 Gy IR, as previously described (Gartner et al., 2000). (D) Germ cell apoptosis was measured by differential interference contrast (DIC) microscopy in animals of the indicated genotype at the indicated time points post IR-treatment. In B,C and D graphs the error bars indicate standard error of mean from at least ten germlines for each time point.

**Figure S3. ATL-1 immunostaining and *rpa-1(RNAi)* controls.** (A) Representative images of ATL-1 immunostaining of mitotic nuclei from untreated animals of the indicated genotype. (B) RPA-1 immunostaining of mitotic nuclei from animals subjected to control RNAi (L4440) and *rpa-1(RNAi)*. (C) Quantification of ATL-1 focus formation of the data shown in Figure 3B. Error bars indicate standard error of mean from at least ten germlines for each time point. (D) Representative images of ATL-1 foci in *brd-1* mutants following HU-treatment.

**Figure S4. Increased ATL-1 foci in checkpoint and DNA repair mutants. (A)** Representative images of ATL-1 immunostaining of mitotic nuclei from animals of the indicated genotype, 4hrs after IR-treatment (75Gy). **(B)** Quantification of the data in (A). Error bars indicate standard error of mean from at least ten germlines for each time point. **(C)** Quantification of ATL-1 foci per nucleus measured at the indicated time points after IR-treatment (75Gy) in animals of the indicated genotype. Error bars indicate standard error of mean from at least 20 nuclei from 10-15 worms of each genotype.

**Figure S5. Dose response** (A) Quantification of IR-induced cell cycle arrest of mitotic germline nuclei in animals of the indicated genotype that was determined by scoring the number of nuclei in a volume of  $54,000\mu\text{m}^3$  12 hours after exposure of L4 stage animals to increasing doses of Gy IR, as previously described (Gartner et al., 2000). (B) Germ cell apoptosis was measured by differential interference contrast (DIC) microscopy in animals of the indicated genotype at the indicated doses of IR. Left graph shows 12 hs post IR-treatment, middle graph shows 24 hs post IR-treatment and right graph shows 36 hs post IR-treatment. Error bars indicate standard error of mean from at least ten germlines for each time point.
