# Supplementary material
Source: PubMed Central journal article supplement (PMC1356337)

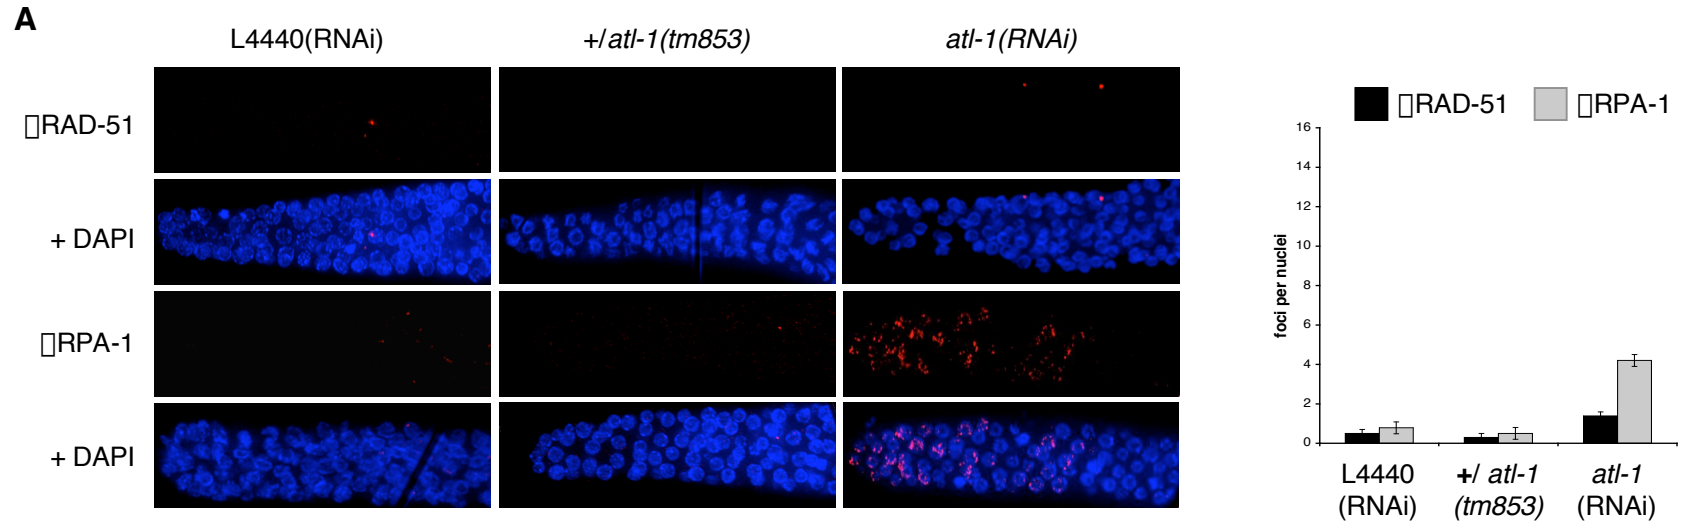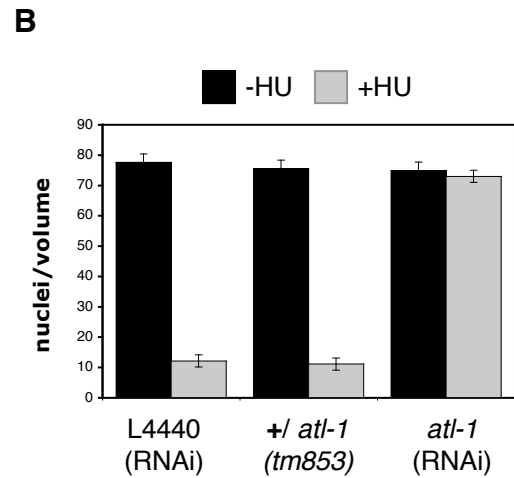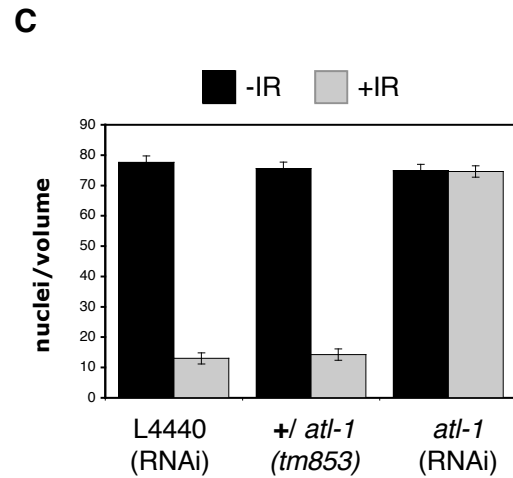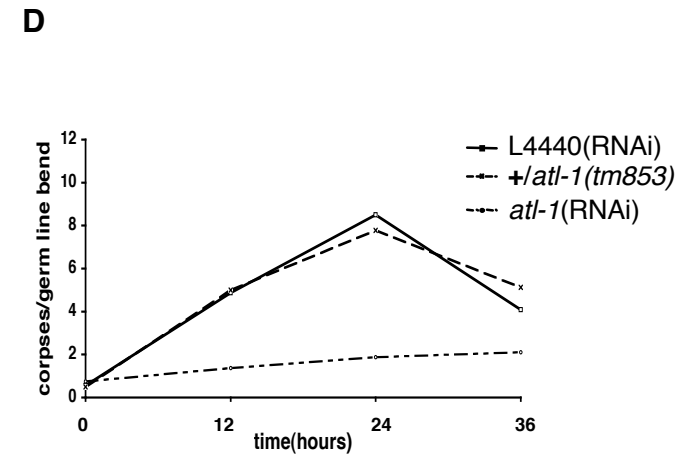

Supplement: 7600896s2.pdf [file 7600896s2.pdf]

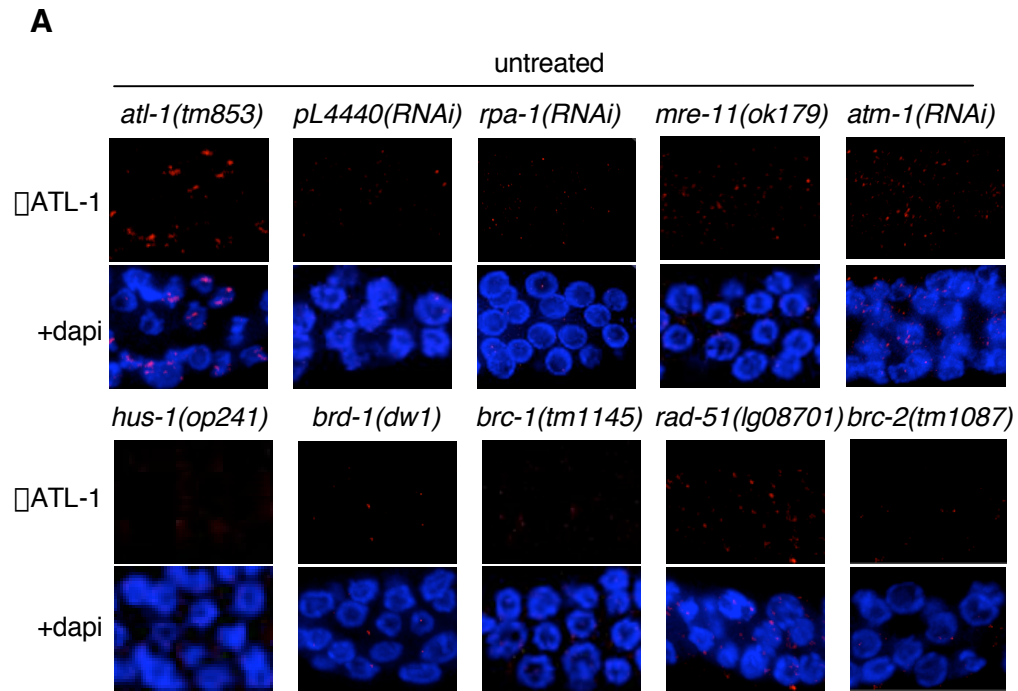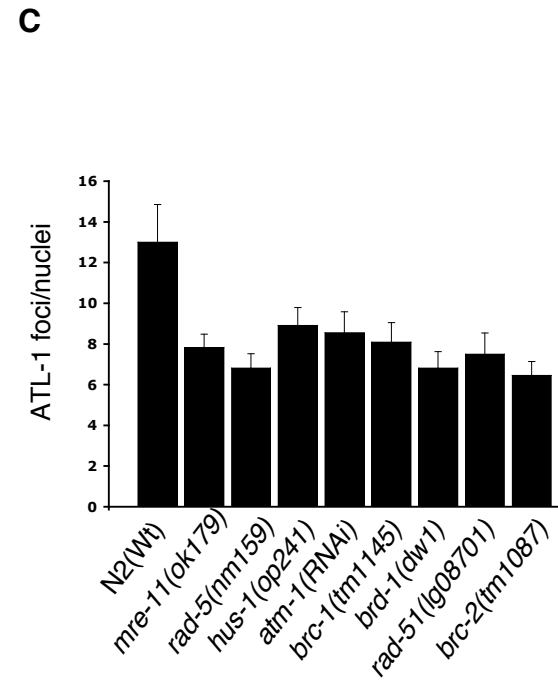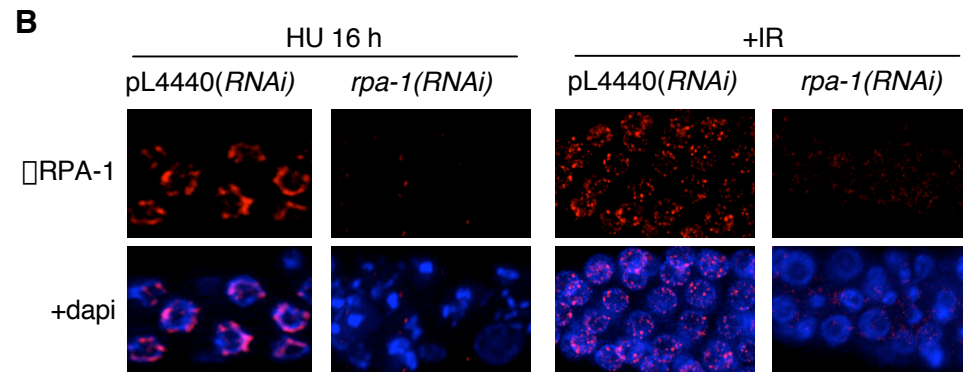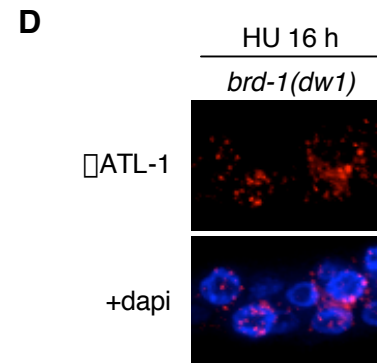

Supplement: 7600896s3.pdf [file 7600896s3.pdf]

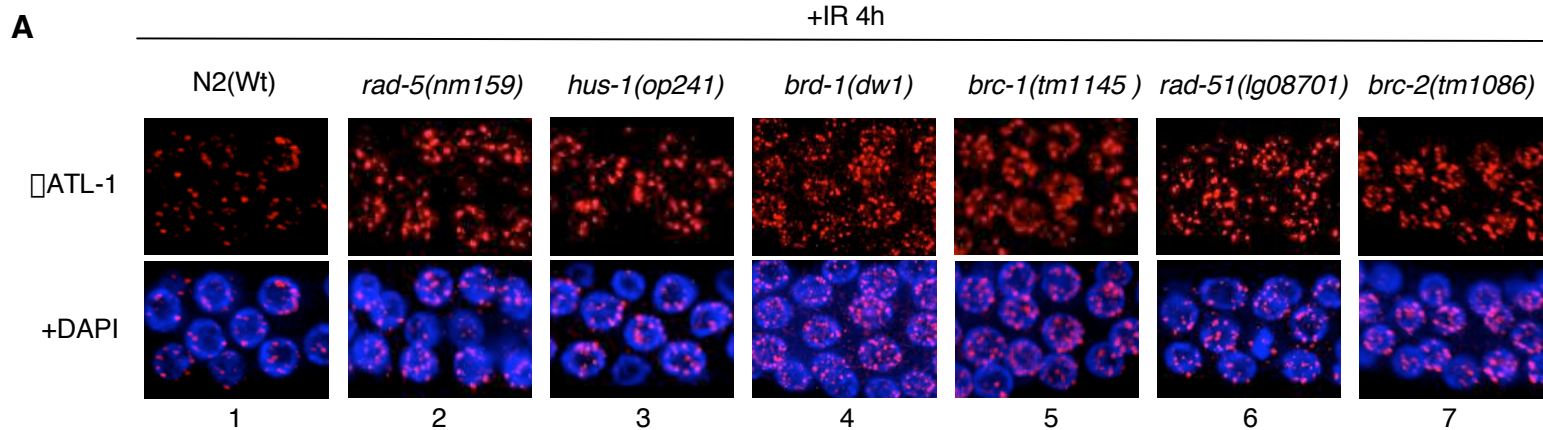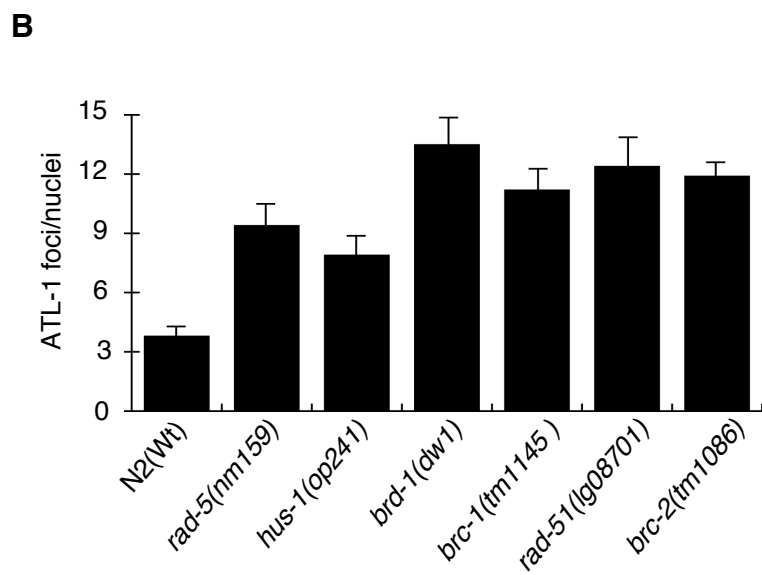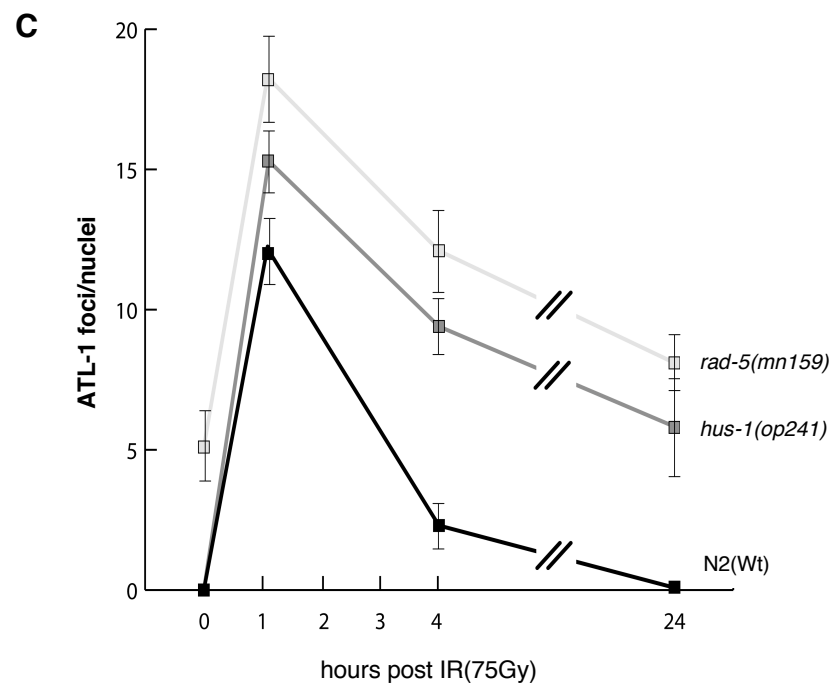

Supplement: 7600896s4.pdf [file 7600896s4.pdf]

**A**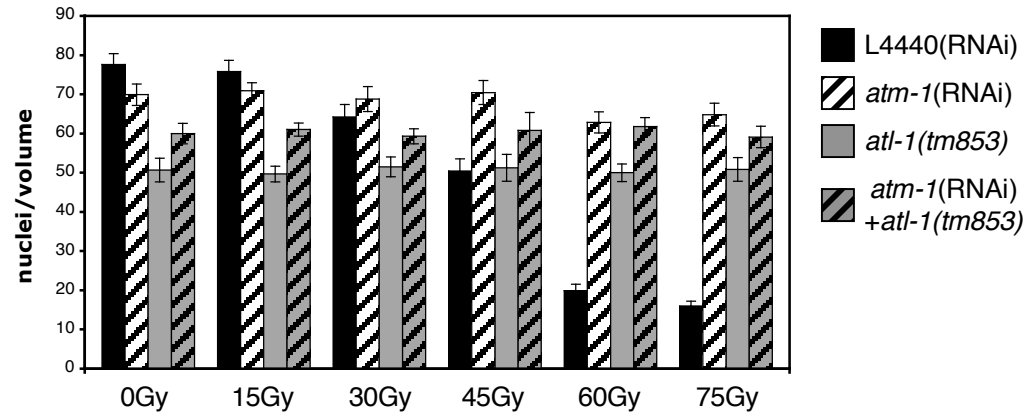**B**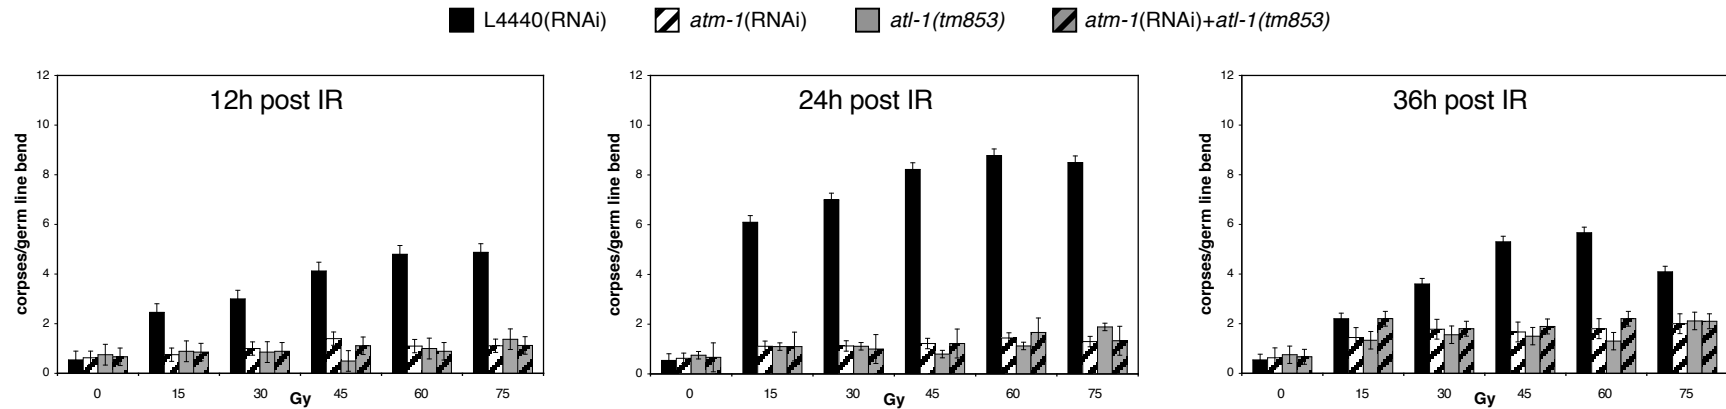

Supplement: 7600896s5.pdf [file 7600896s5.pdf]
